# Supplementary material for: Association of neutrophil-to-lymphocyte ratio with all-cause and cardiovascular mortality among cardiovascular-kidney-metabolic syndrome: a national cross-sectional study
Source: Research Square preprint supplement (doi:10.21203/rs.3.rs-6611872/v1), 2025-06-25
Supplement: Supplementary file 1 [file 2aecf2cf009d9c9c8b40edc4.docx]

**Association of neutrophil-to-lymphocyte ratio with all-cause and cardiovascular mortality among cardiovascular-kidney-metabolic syndrome: a national cross-sectional study**

**Supplementary Information**

**Table S1.** Assessment of multicollinearity among independent variables.

**Table S2** Multivariate cox regression analysis of the association between NLR with all-cause and cardiovascular mortality after excluding NLR exceeding the mean ± 3SD.

**Table S3** Comparison between matched Survival and death group

**Table S4** Multivariate Cox regression analysis of the association between NLR with all-cause and cardiovascular mortality in the propensity score matched cohort.

**Figure S1** Propensity score based on linear model

**Additional file1: Table S1.**

Assessment of multicollinearity among independent variables

| Variables | GVIF |
| --- | --- |
| Age, years | 3.5 |
| Male sex, n (%) | 2.2 |
| BMI, kg/m² | 1.4 |
| Ethnicity, n (%) | 1.3 |
| Marital status, n (%) | 1.1 |
| Education | 1.2 |
| Smoking, n (%) | 1.2 |
| Alcohol use, n (%) | 1.1 |
| Hypertension, n (%) | 1.5 |
| Diabetes, n (%) | 1.9 |
| CVD, n (%) | 2.4 |
| Hyperlipidemia, n (%) | 1.5 |
| Hb(g/L) | 1.8 |
| PLT, ×10⁹/L | 1.3 |
| Neutrophil, ×10⁹/L | 2.7 |
| Lymphocyte, ×10⁹/L | 1.2 |
| FBG, mmol/L | 3.5 |
| HBA1C, % | 3.7 |
| ALT, U/L | 2.4 |
| Creatinine, μmol/L | 2.0 |
| TG, mmol/L | 1.6 |
| TC, mmol/L | 1.4 |
| HDL-C, mmol/L | 1.6 |
| LDL-C, mmol/L | 1.3 |
| eGFR, mL/min/1.73m² | 3.9 |

**Additional file1: Table S2.**

Multivariate Cox regression analysis of the association between NLR with all-cause and cardiovascular mortality after excluding NLR exceeding the mean ± 3SD.

| **Exposure** | **Model 1** | **Model 2** | **Model 3** |
| --- | --- | --- | --- |
|  | **HR (95%CI) *P*-value** | **HR (95%CI) *P*-value** | **HR (95%CI) *P*-value** |
| All-cause mortality | | | |
| NLR | 1.61 (1.47, 1.75) <0.0001 | 1.24 (1.13, 1.37) <0.0001 | 1.21 (1.10, 1.34) <0.0001 |
| NLR tertile |  |  |  |
| T1 | Reference | Reference | Reference |
| T2 | 1.05 (0.80, 1.38) 0.7224 | 0.95 (0.71, 1.26) 0.7066 | 0.90 (0.68, 1.20) 0.4784 |
| T3 | 2.30 (1.82, 2.92) <0.0001 | 1.36 (1.05, 1.76) 0.0181 | 1.28 (0.98, 1.66) 0.0677 |
| Cardiovascular mortality | | | |
| NLR | 0.02 (0.01, 0.06) <0.0001 | 0.10 (0.03, 0.36) 0.0005 | 0.09 (0.02, 0.39) 0.0010 |
| NLR tertile |  |  |  |
| T1 | Reference | Reference | Reference |
| T2 | 1.34 (0.74, 2.43) 0.3287 | 1.22 (0.66, 2.24) 0.5228 | 1.20 (0.64, 2.24) 0.5727 |
| T3 | 3.34 (2.00, 5.57) <0.0001 | 1.97 (1.14, 3.43) 0.0158 | 1.97 (1.11, 3.49) 0.0210 |

NLR tertile: (T1: NLR <1.57; T2: 1.57≤NLR <2.27; T3: NLR≥2.27). HR: hazard ratios; CI: confidence

Model 1: Non-adjusted.

Model 2：adjust for age, sex, BMI, ethnicity status, education level, smoke status, alcohol consumption, hypertension, diabetes.

Mode 3：adjust for age, sex, BMI, ethnicity status, education level, smoke status, alcohol consumption, hypertension, diabetes, CVD, TG, TC, HDL, LDL, HBA1C, eGFR.

**Additional file1: Table S3.**

Comparison between matched group

| Variables | Survival group | Death group | Standardized diff. | P value |
| --- | --- | --- | --- | --- |
| AGE | (906) 59.01 ± 21.44 | (453) 68.60 ± 13.10 | 0.5399 | <0.0001 |
| SEX |  |  | 0.0564 | 0.3564 |
| 0 | 557 (61.5) | 266 (58.7) |  |  |
| 1 | 349 (38.5) | 187 (41.3) |  |  |
| Ethnicity |  |  |  | <0.0001 |
| White | 289 (31.9) | 254 (56.1) | 0.5021 |  |
| Black | 254 (28) | 63 (13.9) | 0.3524 |  |
| Mexican American | 197 (21.7) | 100 (22.1) | 0.0080 |  |
| Other | 166 (18.3) | 36 (7.9) | 0.3108 |  |

For continuous variables: (N) Mean ± SD, Standardized difference = abs(Mean1-Mean0)/sqrt((S1+S2)/2) 
For categorical variables: N (%), Standardized difference = abs(P1-P0)/sqrt((P1*(1-P1)+P0*(1-P0))/2)


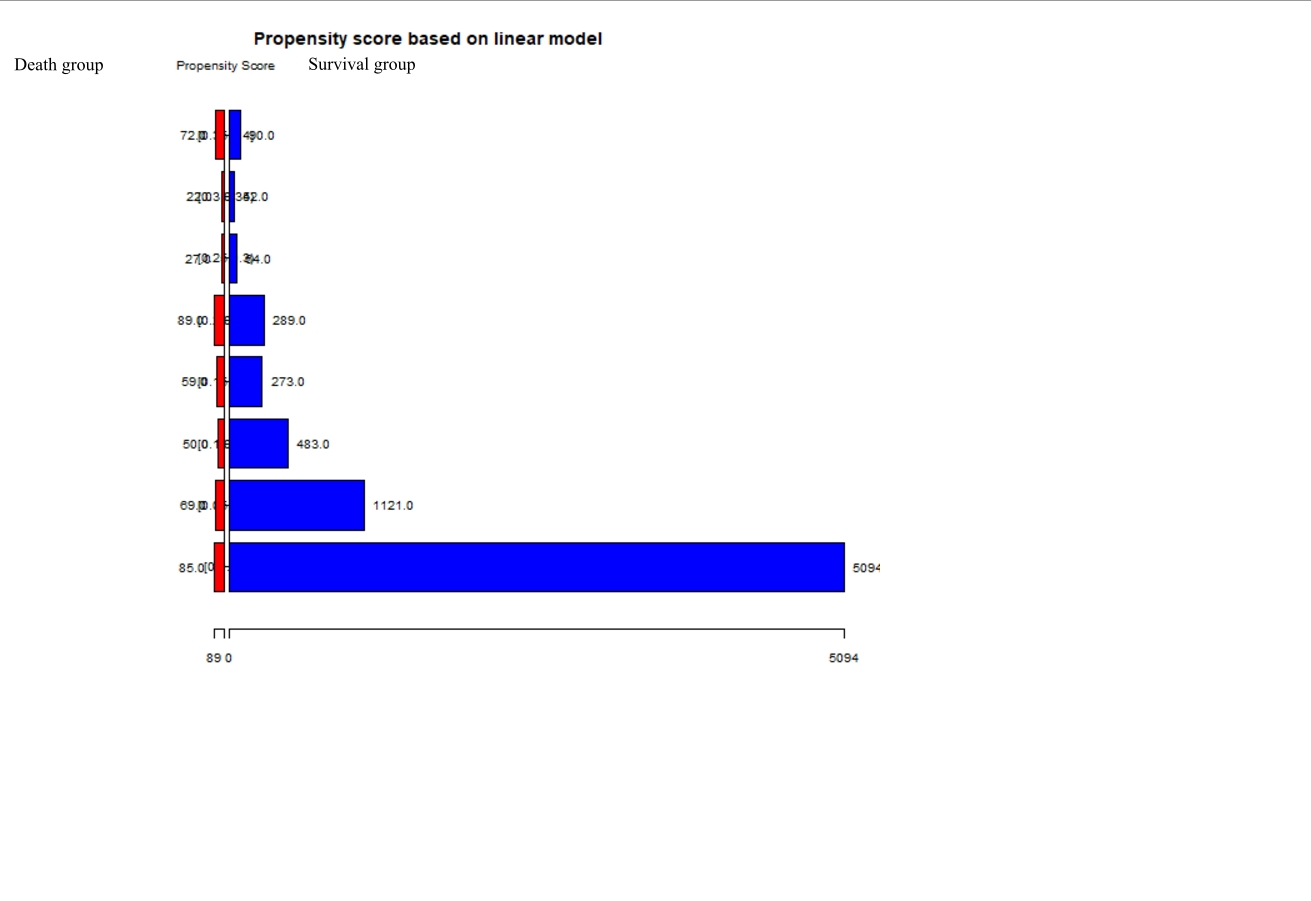


Figure S1: Propensity score based on linear model

**Additional file1: Table S4.**

Multivariate cox regression analysis of the association between NLR with all-cause and cardiovascular mortality in the propensity score matched cohort.

| Exposure | Model 1 | Model 2 | Model 3 |
| --- | --- | --- | --- |
|  | HR (95%CI) *P*-value | HR (95%CI) *P*-value | HR (95%CI) *P*-value |
| All-cause mortality | | | |
| NLR | 1.32 (1.22, 1.43) <0.0001 | 1.15 (1.06, 1.24) 0.0006 | 1.18 (1.09, 1.29) 0.0001 |
| NLR tertile |  |  |  |
| T1 | Reference | Reference | Reference |
| T2 | 1.12 (0.84, 1.49) 0.4475 | 0.98 (0.71, 1.36) 0.9253 | 0.94 (0.68, 1.30) 0.7088 |
| T3 | 2.18 (1.65, 2.86) <0.0001 | 1.58 (1.39, 1.77) 0.0025 | 1.29 (1.17, 1.78) 0.0094 |
| Cardiovascular mortality | | | |
| NLR | 1.15 (1.07, 1.24) <0.0001 | 1.10 (1.02, 1.18) 0.0170 | 1.12 (1.03, 1.22) 0.0063 |
| NLR tertile |  |  |  |
| T1 | Reference | Reference | Reference |
| T2 | 4.66 (2.23, 7.09) 0.0002 | 1.70 (0.17, 3.57) 0.0757 | 1.49 (1.03, 2.01) 0.5265 |
| T3 | 12.05 (9.62, 14.47) <0.0001 | 3.74 (1.78, 5.70) 0.0002 | 1.92 (0.32, 3.53) 0.0190 |

NLR tertile: (T1: NLR <1.57; T2: 1.57≤NLR <2.27; T3: NLR≥2.27). HR: hazard ratios; CI: confidence

Model 1: Non-adjusted.

Model 2：adjust for age, sex, BMI, ethnicity status, education level, smoke status, alcohol consumption, hypertension, diabetes.

Mode 3：adjust for age, sex, BMI, ethnicity status, education level, smoke status, alcohol consumption, hypertension, diabetes, CVD, TG, TC, HDL, LDL, HBA1C, eGFR.
